# Supplementary material for: Coseismic and Early Postseismic Deformation Mechanism Following the 2021 Mw 7.4 Maduo Earthquake: Insights from Satellite Radar Interferometry and GPS
Source: MDPI journal article supplement (doi:10.3390/rs16081399), 2024-04-16
Supplement: s1 [file s1]

## Supplementary File for

# **Coseismic and Early Postseismic Deformation Mechanism Following the 2021 Mw 7.4 Maduo Earthquake: Insights from Satellite Radar Interferometry and GPS**

**Chuanzeng Shu <sup>1</sup>, Zhiguo Meng <sup>1,\*</sup>, Qiong Wu <sup>1</sup>, Wei Xiong <sup>2</sup>, Lijia He <sup>3</sup>, Xiaoping Zhang <sup>4</sup>, and Dan Xu <sup>5</sup>**

<sup>1</sup> College of Geoexploration Science and Technology, Jilin University, Changchun 130026, China; shucz22@mails.jlu.edu.cn (C.S.); mengzg@jlu.edu.cn (Z.M.); wuqiong@jlu.edu.cn (Q.W.)

<sup>2</sup> Key Laboratory of Earthquake Geodesy, Institute of Seismology, China Earthquake Administration, Wuhan 430071, China; xiongwei@cgeps.ac.cn (W.X.)

<sup>3</sup> Laboratory of Radar Remote Sensing, School of Geosciences and Info-Physics, Central South University, Changsha 410083, China; lijiahe@csu.edu.cn (L.H.)

<sup>4</sup> State Key Laboratory of Lunar and Planetary Sciences, Macau University of Science and Technology, Macau 999078, China; xpzhang@must.edu.mo (X.Z.)

<sup>5</sup> Changbai Mountain Tianchi Volcano Observatory, Antu 133618, China; dxu8123@gmail.com (D.X.)

\* Correspondence: mengzg@jlu.edu.cn

## **Contents of this file**

Figures S1 to S6

Table S1

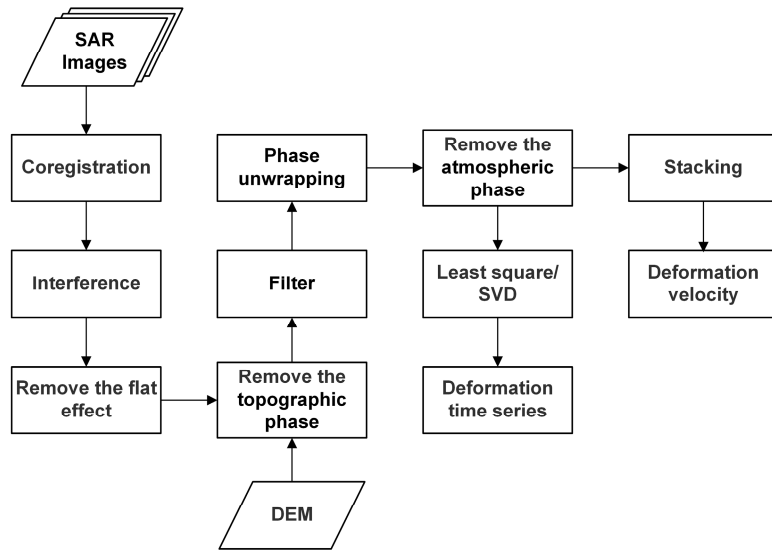

**Figure S1.** The processing flowchart of SBAS-InSAR and Stacking-InSAR methods.

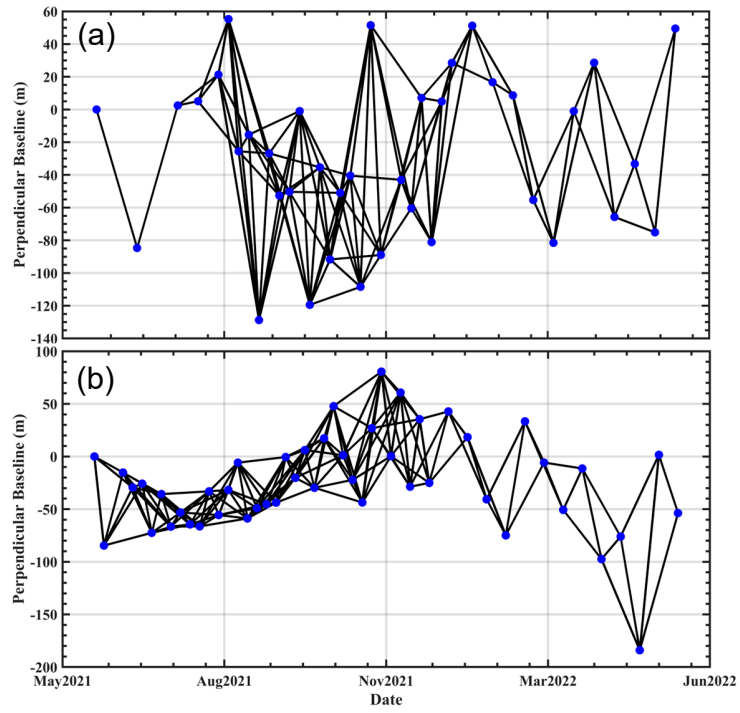

**Figure S2.** The distribution combination of interference pairs from ascending orbit 99 (a) and descending orbit 106 (b).

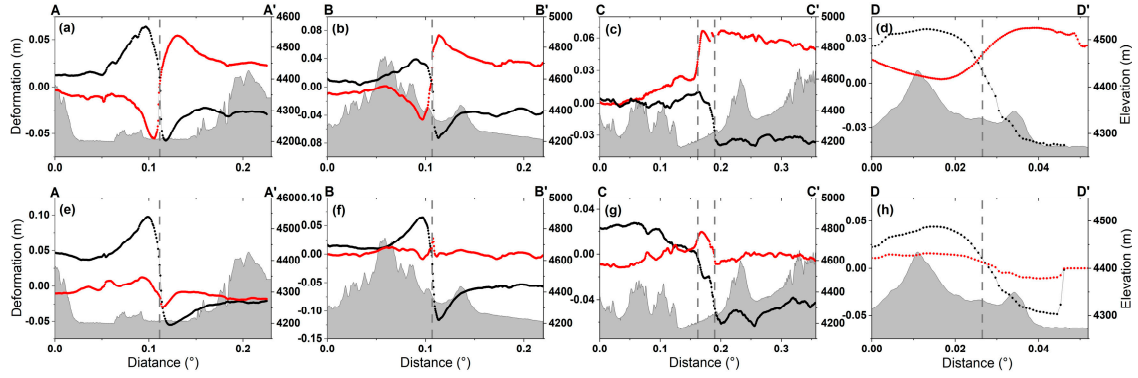

**Figure S3.** Deformation profiles (a)–(h) along measuring lines A–A', B–B', C–C', and D–D' spanning seismogenic fault. The gray vertical dashed line represents the location of the seismogenic fault, while the gray contour represents the topographic relief. In subgraphs (a)–(d), the red dots are collected from the LOS deformation map of the ascending orbit (see Figure 4c), and the black dots are collected from the LOS deformation map of the descending orbit (see Figure 4g). In subgraphs (e)–(h), the red dots are collected from the 2.5-D quasi-EW deformation map (see Figure 7c) and the black dots are collected from the 2.5-D quasi-vertical deformation map (see Figure 7g). The deformation values in the quasi-E and the quasi-upward directions are positive.

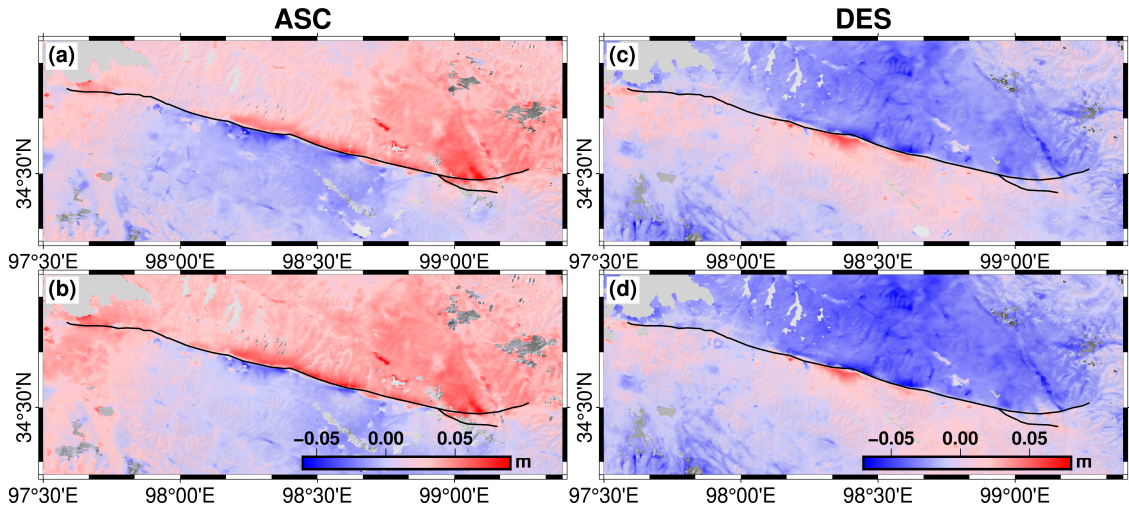

**Figure S4.** (a) and (c) represent the deformation observed by InSAR, while (b) and (d) represent the deformation after removing the effects of viscoelastic relaxation and poroelastic rebound.

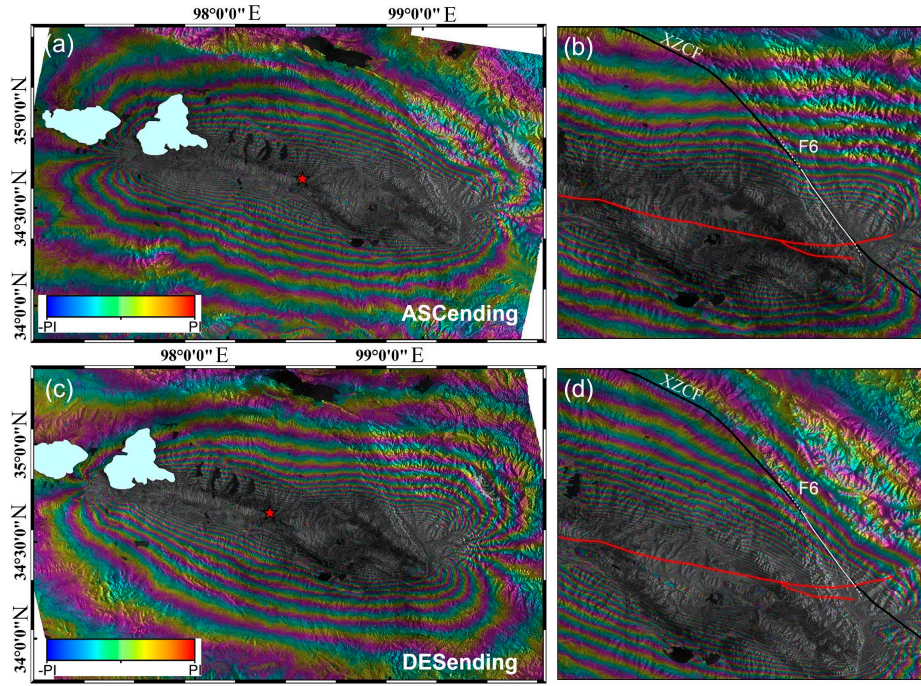

**Figure S5.** D-InSAR interferograms (20210520–20210526) from the ascending (a, b) and descending (c, d) orbits of the Maduo event. Each subplot was rendered with 50% transparency. F6 represents the fault reactivated by the Maduo event, and the white dashed line represents the inferred fault segment based on the deformation signal.



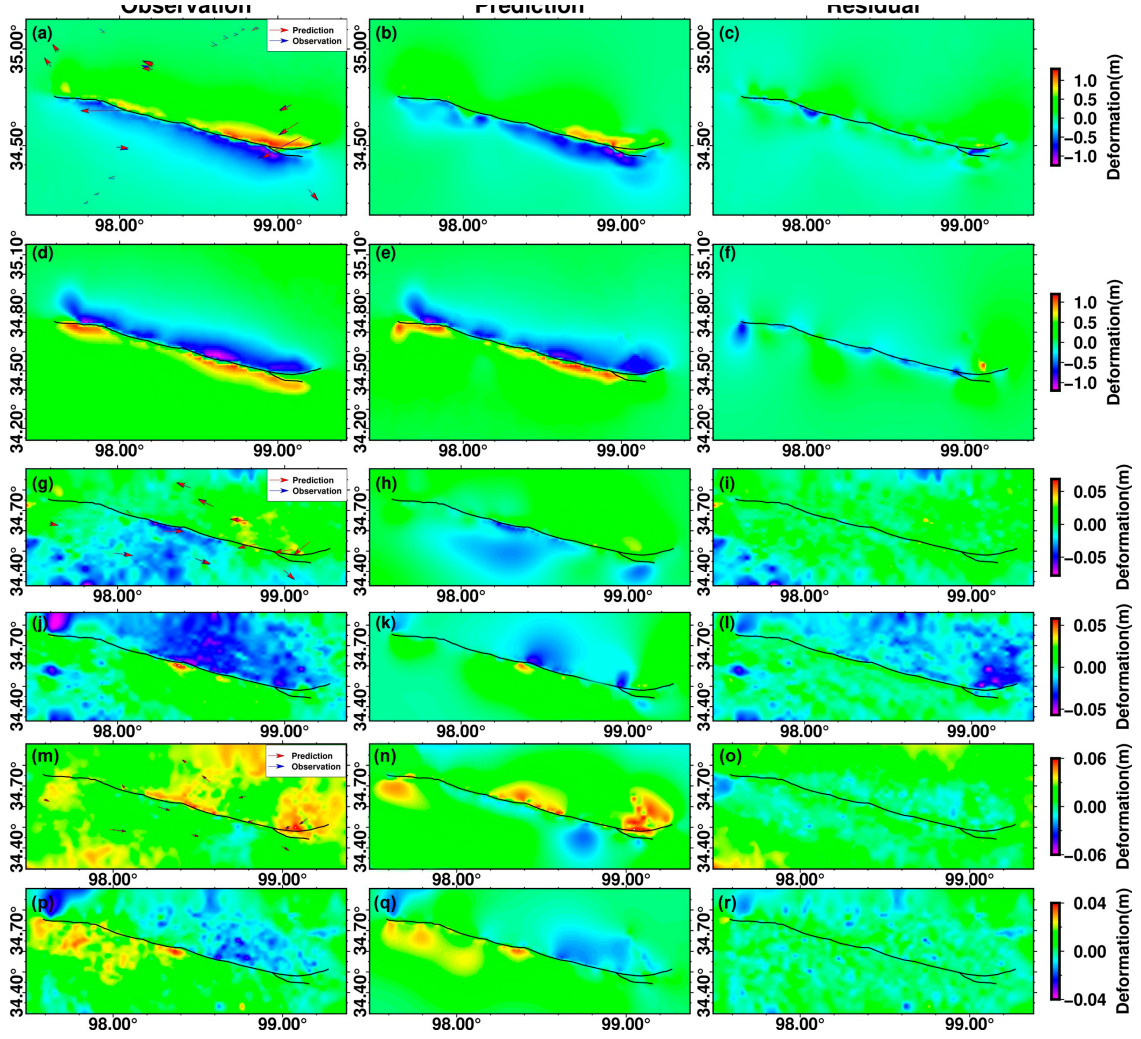

**Figure S6.** Observed displacements (a, d, g, j, m, and p), best-fit model predictions (b, e, h, k, n, and q), and residuals (c, f, i, l, o, and r) in coseismic and postseismic (the early stage and 1 year) slip models. The (a) and (d) represent the D-InSAR deformation from the ascending and descending orbits used for the inversion of coseismic slip. Similarly, (g) and (j) represent one year after the mainshock, while (m) and (p) represent the early stage after the mainshock. The arrows in subgraphs (a) (m), and (g) represent GPS displacements that constrain coseismic and postseismic (the early stage and 1 year) slip, respectively.

**Table S1.** SAR data and GPS Stations used in co- and postseismic observations.

| Sensor       | Track | Pass      | Acquisition time<br>(yyyymmdd) | Track | Pass       | Acquisition time<br>(yyyymmdd) | GPS Stations<br>(Coseismic) | GPS Stations<br>(Postseismic) |
|--------------|-------|-----------|--------------------------------|-------|------------|--------------------------------|-----------------------------|-------------------------------|
| Sentinel-A/B | 99    | Ascending | 20210526                       | 106   | Descending | 20210526                       | 4432                        | 2836                          |
|              |       |           | 20210619                       |       |            | 20210601                       | 4441                        | 2840                          |
|              |       |           | 20210713                       |       |            | 20210613                       | 4447                        | 4454                          |
|              |       |           | 20210725                       |       |            | 20210619                       | 4452                        | 4499                          |
|              |       |           | 20210806                       |       |            | 20210625                       | 4454                        | J406                          |
|              |       |           | 20210812                       |       |            | 20210701                       | 4495                        | JDUO                          |
|              |       |           | 20210818                       |       |            | 20210707                       | 4499                        | KANQ                          |
|              |       |           | 20210824                       |       |            | 20210713                       | 4515                        | MD01                          |
|              |       |           | 20210830                       |       |            | 20210719                       | 4519                        | MD02                          |
|              |       |           | 20210905                       |       |            | 20210725                       | BFMQ                        | MD03                          |
|              |       |           | 20210911                       |       |            | 20210731                       | BUDR                        | MD04                          |
|              |       |           | 20210917                       |       |            | 20210806                       | BUJZ                        | MD05                          |
|              |       |           | 20210923                       |       |            | 20210812                       | CHDU                        | MD07                          |
|              |       |           | 20210929                       |       |            | 20210818                       | DLHA                        | MD09                          |
|              |       |           | 20211005                       |       |            | 20210824                       | GAND                        | MD10                          |
|              |       |           | 20211011                       |       |            | 20210830                       | GAZH                        | QHMD                          |
|              |       |           | 20211017                       |       |            | 20210905                       | GCHA                        |                               |
|              |       |           | 20211023                       |       |            | 20210911                       | GERM                        |                               |
|              |       |           | 20211029                       |       |            | 20210917                       | GSMA                        |                               |
|              |       |           | 20211104                       |       |            | 20210923                       | HAIY                        |                               |
|              |       |           | 20211110                       |       |            | 20210929                       | HMHE                        |                               |
|              |       |           | 20211122                       |       |            | 20211005                       | HSHX                        |                               |
|              |       |           | 20211128                       |       |            | 20211011                       | HTTL                        |                               |
|              |       |           | 20211204                       |       |            | 20211017                       | IG01                        |                               |
|              |       |           | 20211210                       |       |            | 20211023                       | IG02                        |                               |
|              |       |           | 20211216                       |       |            | 20211029                       | IG03                        |                               |
|              |       |           | 20211222                       |       |            | 20211104                       | IG04                        |                               |
|              |       |           | 20220103                       |       |            | 20211110                       | IG05                        |                               |
|              |       |           | 20220115                       |       |            | 20211116                       | IG07                        |                               |
|              |       |           | 20220127                       |       |            | 20211122                       | IG08                        |                               |
|              |       |           | 20220208                       |       |            | 20211128                       | IG09                        |                               |
|              |       |           | 20220220                       |       |            | 20211204                       | IG10                        |                               |
|              |       |           | 20220304                       |       |            | 20211210                       | IG11                        |                               |
|              |       |           | 20220316                       |       |            | 20211216                       | J005                        |                               |
|              |       |           | 20220328                       |       |            | 20211222                       | J406                        |                               |
|              |       |           | 20220409                       |       |            | 20220103                       | JDUO                        |                               |
|              |       |           | 20220421                       |       |            | 20220115                       | KANQ                        |                               |
|              |       |           | 20220503                       |       |            | 20220127                       | LAJA                        |                               |
|              |       |           |                                |       |            | 20220208                       | LBAO                        |                               |
|              |       |           |                                |       |            | 20220220                       | LOYX                        |                               |
|              |       |           |                                |       |            | 20220304                       | MADU                        |                               |
|              |       |           |                                |       |            | 20220316                       | MAIX                        |                               |
|              |       |           |                                |       |            | 20220328                       | NANQ                        |                               |
|              |       |           |                                |       |            | 20220409                       | NMUH                        |                               |
|              |       |           |                                |       |            | 20220421                       | QHAE                        |                               |
|              |       |           |                                |       |            | 20220503                       | QHAG                        |                               |
|              |       |           |                                |       |            |                                | QHAH                        |                               |
|              |       |           |                                |       |            |                                | QHAJ                        |                               |

|  |  |  |  |  |  |  |                                                                                                                                                      |  |
|--|--|--|--|--|--|--|------------------------------------------------------------------------------------------------------------------------------------------------------|--|
|  |  |  |  |  |  |  | QHBM<br>QHDL<br>QHGC<br>QHGE<br>QHMD<br>QHMQ<br>QHQM<br>QHTJ<br>QSHE<br>TIEG<br>WENQ<br>XNIN<br>XRID<br>YANH<br>YEGE<br>YS20<br>YS21<br>YUSH<br>ZHID |  |
|--|--|--|--|--|--|--|------------------------------------------------------------------------------------------------------------------------------------------------------|--|
